# Supplementary material
Source: HighWire-hosted journal article supplement (http://www.cmaj.ca/highwire/filestream/68474/field_highwire_adjunct_files/0/170443-five-1-at.pdf)
Supplement: 170443-five-1-at.pdf [file 170443-five-1-at.pdf]

# Appendix 1 (as supplied by the authors): Risk factors for evaluation when assessing probability of progression to kidney failure<sup>1,2</sup>

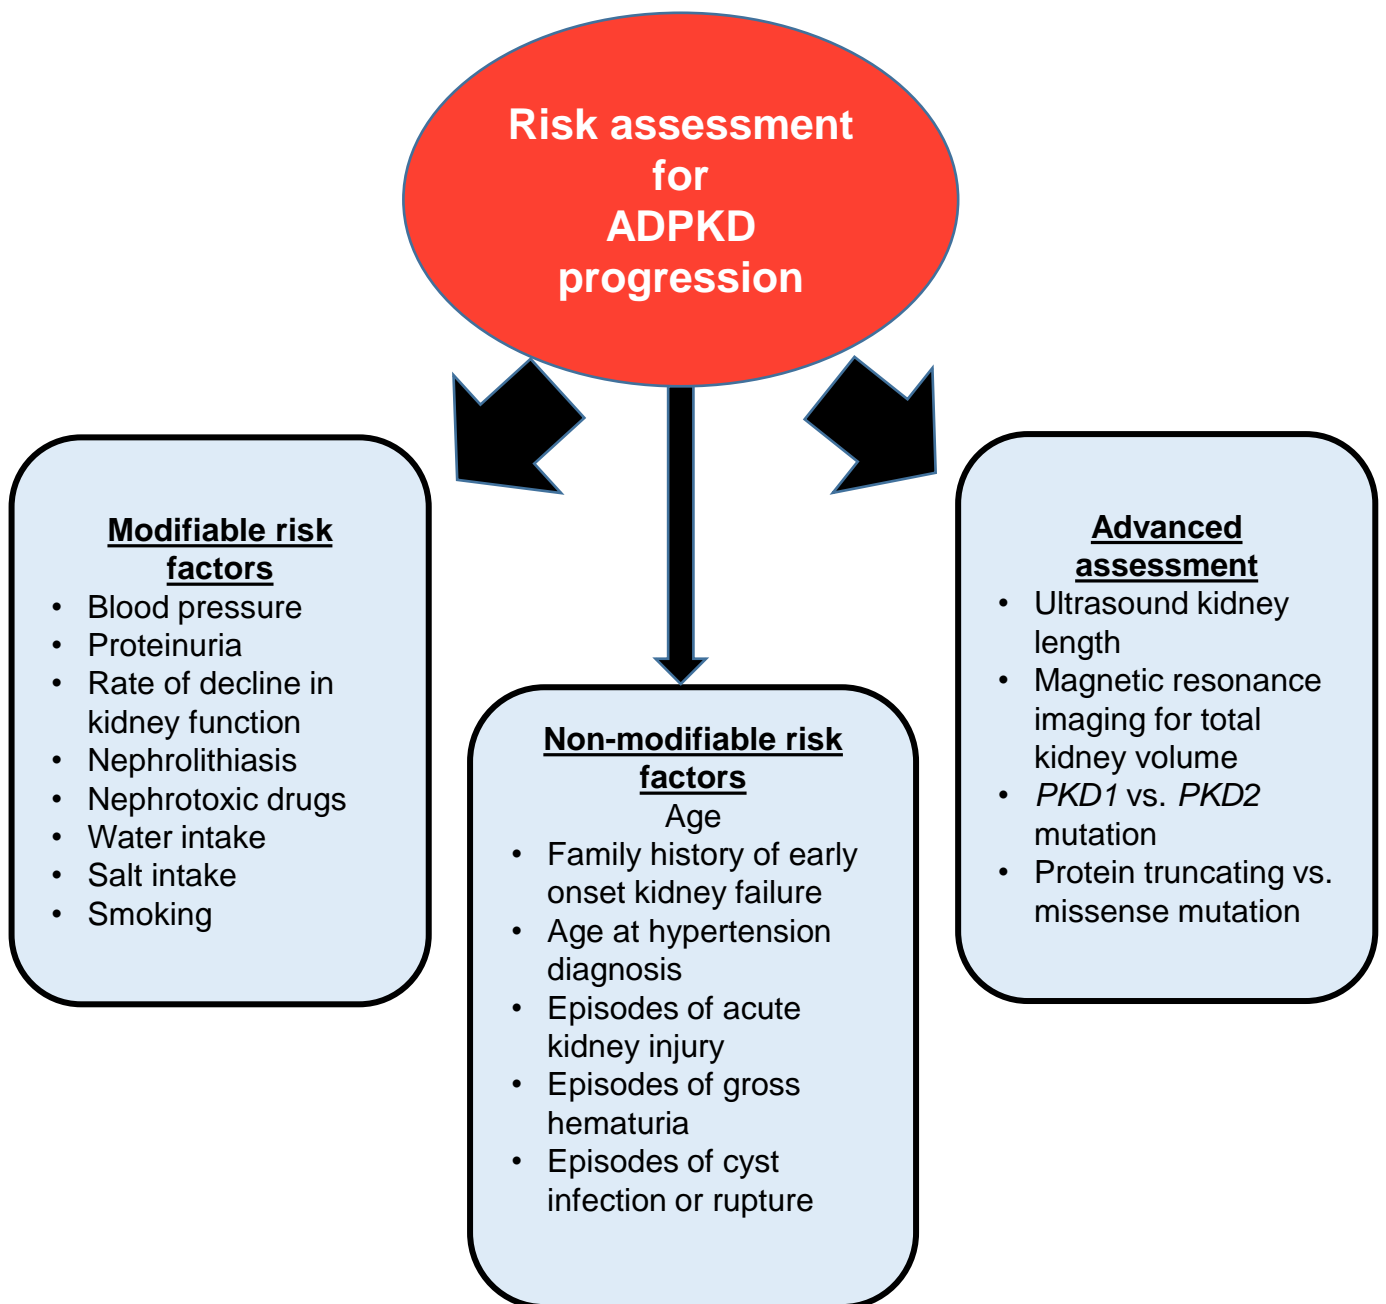

ADPKD = autosomal dominant polycystic kidney disease.

## References

1. Soroka S, Alam A, Bevilacqua M, Girard LP, Komenda P, Loertscher R, et al. Assessing Risk of Disease Progression and Pharmacological Management of Autosomal Dominant Polycystic Kidney Disease: A Canadian Expert Consensus. *Can J Kidney Health Dis.* 2017;4:2054358117695784.
2. Schrier RW, Brosnahan G, Cadnapaphornchai MA, Chonchol M, Friend K, Gitomer B, et al. Predictors of autosomal dominant polycystic kidney disease progression. *J Am Soc Nephrol.* 2014;25(11):2399-418.
